# Supplementary material
Source: publisher figshare collection journal article supplement (https://tandf.figshare.com/ndownloader/files/12764915)
Supplement: Supplementary file 1 [file 12764915]

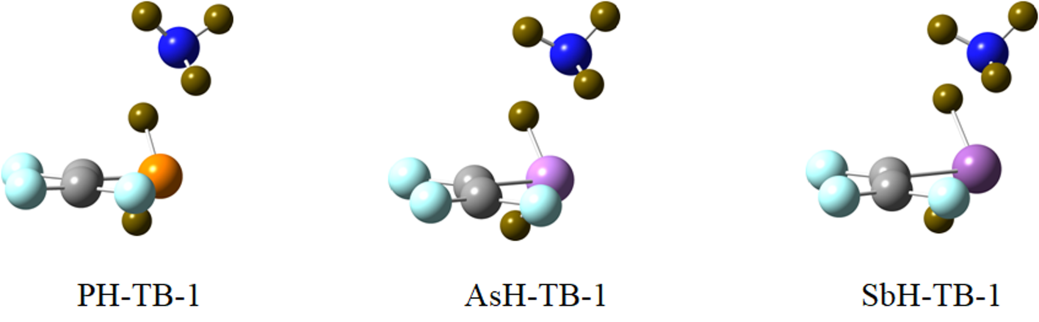


Figure S1 View along the C=C axis of ZH-TB-1


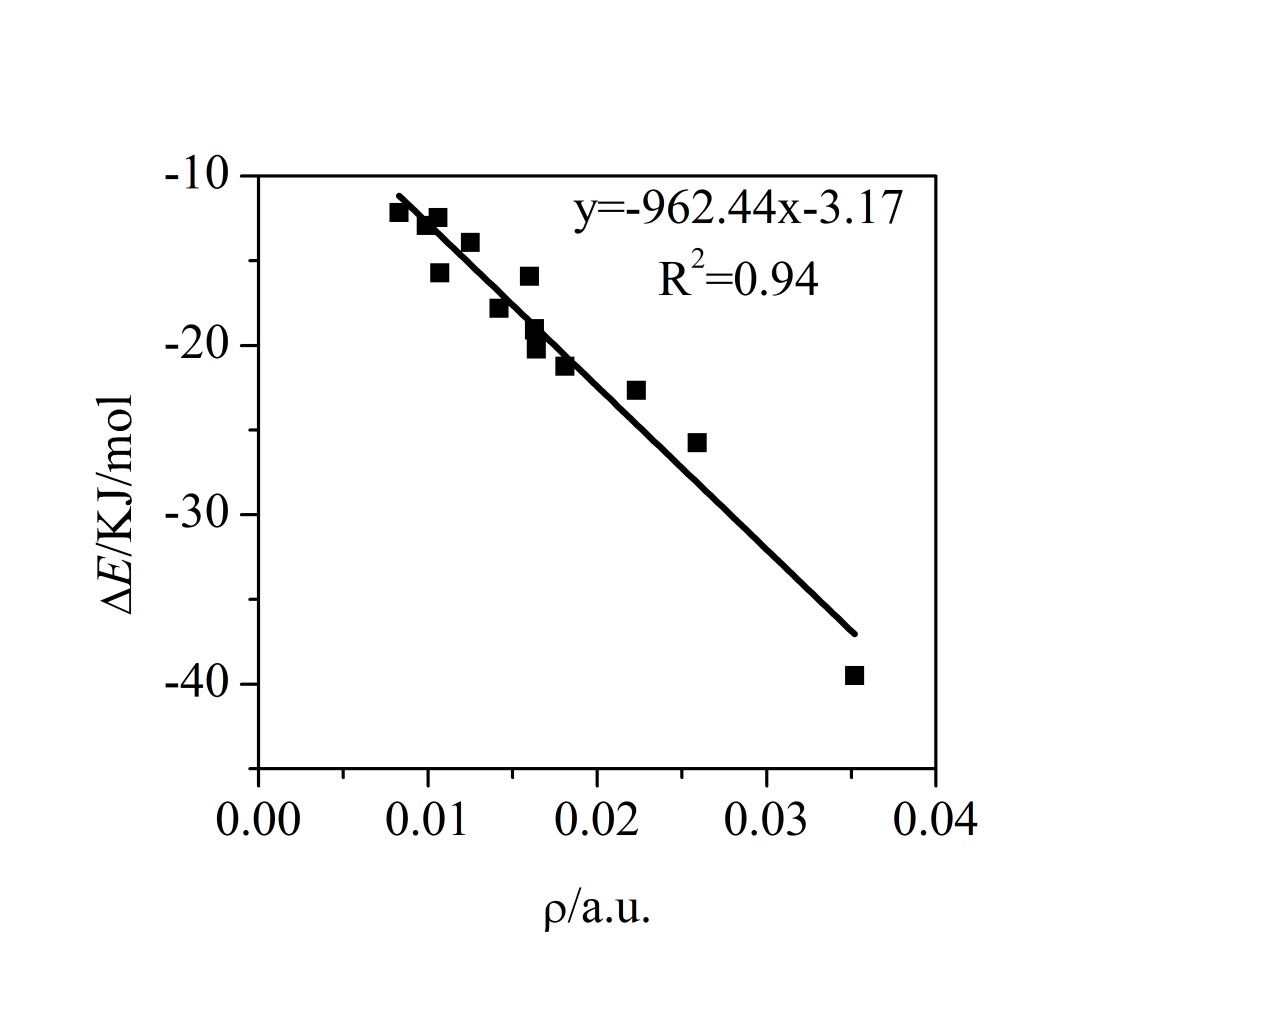


Figure S2 Relationship between the interaction energy (∆E) and the electron density (ρ)


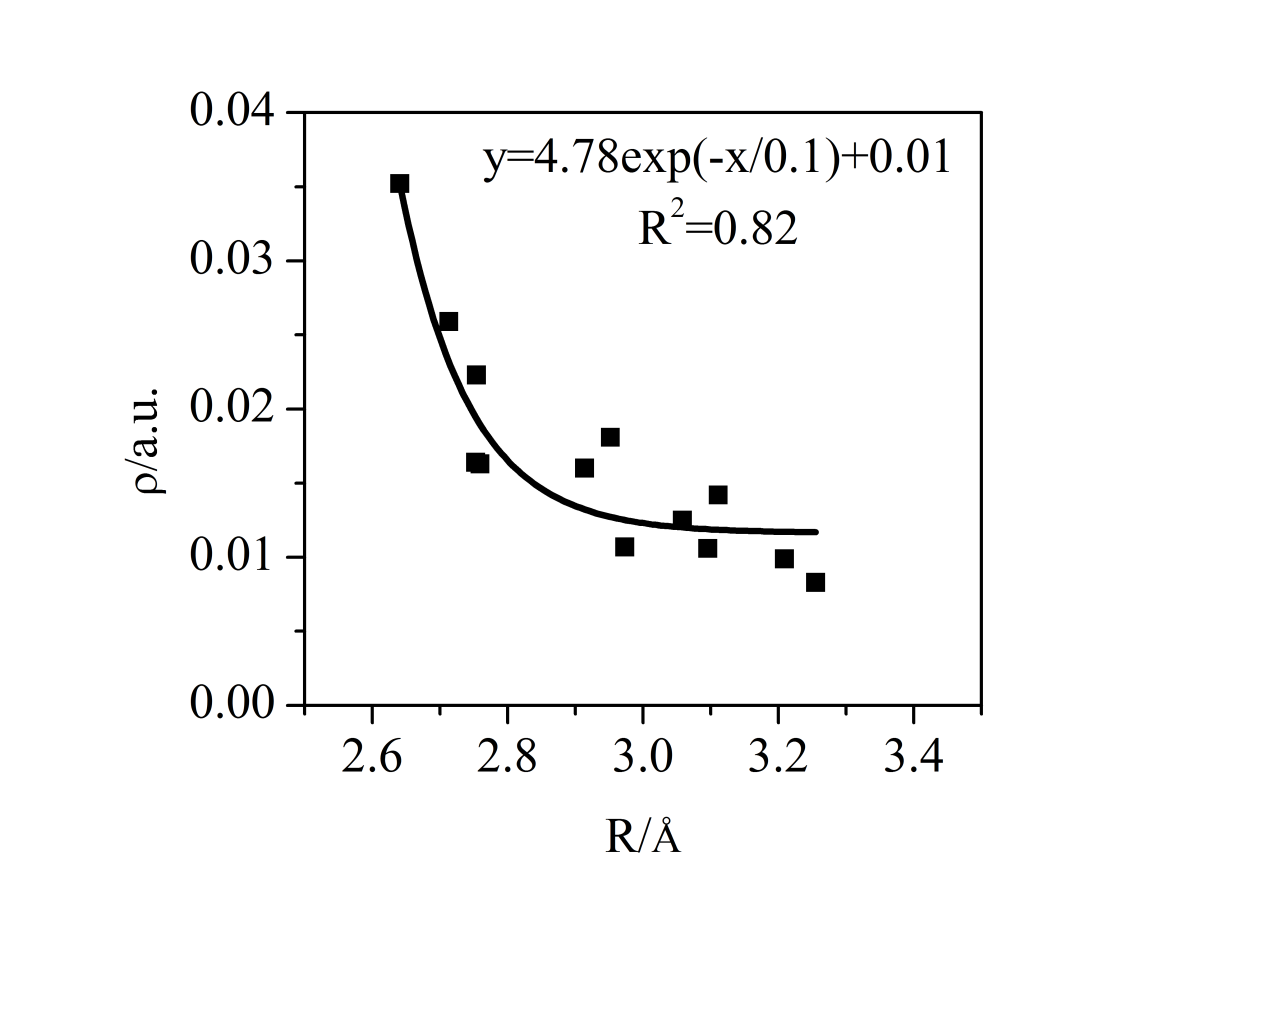


Figure S3 Relationship between the electron density (ρ) and the binding distance (R)
